# Supplementary material for: Low Frequency of Cancer-Predisposition Gene Mutations in Liver Transplant Candidates with Hepatocellular Carcinoma
Source: MDPI journal article supplement (doi:10.3390/cancers15010201), 2022-12-29

## **Low frequency of cancer-predisposition gene mutations in liver transplant candidates with hepatocellular carcinoma**

Klara Horackova, Sona Frankova, Petra Zemankova, Petr Nehasil, Marta Cerna, Magdalena Neroldova, Barbora Otahalova, Jan Kral, Milena Hovhannisyanyan, Viktor Stranecky, Tomas Zima, Marketa Safarikova, Marta Kalousova, CZEKANCA consortium, Jan Novotny, Jan Sperl, Marianna Borecka, Sandra Jelinkova, Michal Vocka, Marketa Janatova, Petra Kleiblova, Zdenek Kleibl, Milan Jirsa, Jana Soukupova

### **SUPPLEMENTARY MATERIALS – TABLE OF CONTENTS:**

|                                                                                                                                                                      |
|----------------------------------------------------------------------------------------------------------------------------------------------------------------------|
| <b>Table S1: List of CZEKANCA consortium members</b>                                                                                                                 |
| <b>Table S2: List of 226 genes included in the CZEKANCA panel (and used transcription variants), divided into two groups based on their clinical significance.</b>   |
| <b>Table S3: Clinicopathological characteristics in 334 HCC patients' subgroups of carriers PV in cancer-predisposition genes (any CPG) and non-carriers (None).</b> |
| <b>Table S4: Characterization of HCC patients from retrospective CZEKANCA consortium database.</b>                                                                   |
| <b>Figure S1: Survival of variant carriers in A. established genes, B. candidate genes, C. MRN genes compared to non-carriers.</b>                                   |

**Table S1: List of CZE CANCA consortium members**

| <b>Institution</b>                                                                                                                                                    | <b>Members</b>                                                                    |
|-----------------------------------------------------------------------------------------------------------------------------------------------------------------------|-----------------------------------------------------------------------------------|
| Institute of Biochemistry and Experimental Oncology, First Faculty of Medicine, Charles University, Prague, Czech Republic                                            | Zdenek Kleibl, Jana Soukupova, Marketa Janatova Petra Zemankova, Marianna Borecka |
| Department of Cancer Epidemiology and Genetics, Masaryk Memorial Cancer Institute, Brno, Czech Republic                                                               | Eva Machackova, Lenka Foretova, Dita Hanouskova                                   |
| Department of Medical Genetics, AGEL Laboratories, AGEL Research and Training Institute, Novy Jicin, Czech Republic                                                   | Spiros Tavandzis, Vera Krutilkova, Barbora Roszkova                               |
| Centre for Medical Genetics and Reproductive Medicine, Gennet, Prague, Czech Republic                                                                                 | Monika Koudova, Stepan Chvojka, Leona Cerna Jana Vavrova                          |
| Institute of Biology and Medical Genetics, General University Hospital and First Faculty of Medicine, Charles University, Prague, Czech Republic                      | Petra Kleiblova, Michal Vocka, Jan Novotny Ondrej Havranek                        |
| Department of Medical Genetics, GHC Genetics, Prague, Czech Republic                                                                                                  | Lucie Hruskova, Renata Michalovska, Zdenka Vlckova Denisa Schwetzova              |
| Institute of Medical Genetics, University Hospital Pilsen, Pilsen, Czech Republic.                                                                                    | Monika Cerna, Marketa Hejnalova, Nikol Jedlickova Ivan Subrt, Tomas Zavoral       |
| Department of Medical Genetics, Pronatal, Prague, Czech Republic                                                                                                      | Marcela Kosarova, Klara Kozakova, Alena Fullsackova Gabriela Vacinova             |
| Department of Medical Genetics, University Hospital Olomouc, Faculty of Medicine and Dentistry, Palacky University Olomouc, Czech Republic                            | Maria Janikova, Romana Kratochvilova, Vaclava Curtisova                           |
| Laboratory of Molecular Genetics, Hospital Ceske Budejovice, Ceske Budejovice, Czech Republic.                                                                        | Ondrej Scheinost, Petra Duskova                                                   |
| Department of Paediatrics and Inherited Metabolic Disorders, First Faculty of Medicine, Charles University and General University Hospital in Prague, Czech Republic. | Viktor Stranecky, Petr Nehasil                                                    |
| Laboratory of Cancer Cell Biology, Institute of Molecular Genetics of the Czech Academy of Sciences, Prague, Czech Republic.                                          | Libor Macurek                                                                     |

**Table S2: List of 226 genes included in the CZECA panel (and used transcription variants), divided into two groups based on their clinical significance.**

|                                                    |                                                                                                                                                                                                                                                                                                                                                                                                                                                                                                                                                                                                                                                                                                                                                                                                                                                                                                                                                                                                                                                                                                                                                                                                                                                                                                                                                                                                                                                                                                                                                                                                                                                                                                                                                                                                                                                                                                                                                                                                                                                                                                                                                                                                                                                                                                                                                                                                                                                                                                                                                                                                                                                                                                                                                                                                                                                                                                                                                                                                                                                                                                                                                                                                                                                                                                                                                                                                                                                                                                                                                                                                                                                                                                                                                                                                                                                                                                                                                                                                                                                                                                                                                                                                                                                                                                                                                                                                                                                                                                                                                                                                                                                                                                                                                                                                                                                                  |
|----------------------------------------------------|------------------------------------------------------------------------------------------------------------------------------------------------------------------------------------------------------------------------------------------------------------------------------------------------------------------------------------------------------------------------------------------------------------------------------------------------------------------------------------------------------------------------------------------------------------------------------------------------------------------------------------------------------------------------------------------------------------------------------------------------------------------------------------------------------------------------------------------------------------------------------------------------------------------------------------------------------------------------------------------------------------------------------------------------------------------------------------------------------------------------------------------------------------------------------------------------------------------------------------------------------------------------------------------------------------------------------------------------------------------------------------------------------------------------------------------------------------------------------------------------------------------------------------------------------------------------------------------------------------------------------------------------------------------------------------------------------------------------------------------------------------------------------------------------------------------------------------------------------------------------------------------------------------------------------------------------------------------------------------------------------------------------------------------------------------------------------------------------------------------------------------------------------------------------------------------------------------------------------------------------------------------------------------------------------------------------------------------------------------------------------------------------------------------------------------------------------------------------------------------------------------------------------------------------------------------------------------------------------------------------------------------------------------------------------------------------------------------------------------------------------------------------------------------------------------------------------------------------------------------------------------------------------------------------------------------------------------------------------------------------------------------------------------------------------------------------------------------------------------------------------------------------------------------------------------------------------------------------------------------------------------------------------------------------------------------------------------------------------------------------------------------------------------------------------------------------------------------------------------------------------------------------------------------------------------------------------------------------------------------------------------------------------------------------------------------------------------------------------------------------------------------------------------------------------------------------------------------------------------------------------------------------------------------------------------------------------------------------------------------------------------------------------------------------------------------------------------------------------------------------------------------------------------------------------------------------------------------------------------------------------------------------------------------------------------------------------------------------------------------------------------------------------------------------------------------------------------------------------------------------------------------------------------------------------------------------------------------------------------------------------------------------------------------------------------------------------------------------------------------------------------------------------------------------------------------------------------------------------------------|
| Established<br>high-to-moderate<br>CPG<br>(N = 48) | <p><i>APC</i> (NM_000038), <i>ATM</i> (NM_000051), <i>BAP1</i> (NM_004656), <i>BARD1</i> (NM_000465), <i>BMPRIA</i> (NM_004329), <i>BRCA1</i> (NM_007294), <i>BRCA2</i> (NM_000059), <i>BRIPI</i> (NM_032043), <i>CDHI</i> (NM_004360), <i>CDK4</i> (NM_000075), <i>CDKN2A</i> (NM_000077), <i>CHEK2</i> (NM_007194), <i>EPCAM</i> (NM_002354), <i>FH</i> (NM_000143), <i>FLCN</i> (NM_144997), <i>KIT</i> (NM_000222), <i>MEN1</i> (NM_000244), <i>MET</i> (NM_001127500), <i>MLH1</i> (NM_000249), <i>MSH2</i> (NM_000251), <i>MSH6</i> (NM_000179), <i>MUTYH</i>* (NM_001128425), <i>NBN</i> (NM_002485), <i>NFI</i> (NM_000267), <i>NF2</i> (NM_000268), <i>PALB2</i> (NM_024675), <i>PMS2</i> (NM_000535), <i>POLD1</i> (NM_002691), <i>POLE</i> (NM_006231), <i>PRKARIA</i> (NM_212471), <i>PTEN</i> (NM_000314), <i>PTCH1</i> (NM_000264), <i>RAD51C</i> (NM_058216), <i>RAD51D</i> (NM_002878), <i>RBI</i> (NM_000321), <i>RET</i> (NM_020975), <i>SDHB</i> (NM_003000), <i>SDHC</i> (NM_003001), <i>SDHD</i> (NM_003002), <i>SMAD4</i> (NM_005359), <i>SMARCB1</i> (NM_003073), <i>STK11</i> (NM_000455), <i>SUFU</i> (NM_016169), <i>TP53</i> (NM_000546), <i>TSC1</i> (NM_000368), <i>TSC2</i> (NM_000548), <i>VHL</i> (NM_000551), <i>WT1</i> (NM_024426)</p>                                                                                                                                                                                                                                                                                                                                                                                                                                                                                                                                                                                                                                                                                                                                                                                                                                                                                                                                                                                                                                                                                                                                                                                                                                                                                                                                                                                                                                                                                                                                                                                                                                                                                                                                                                                                                                                                                                                                                                                                                                                                                                                                                                                                                                                                                                                                                                                                                                                                                                                                                                                                                                                                                                                                                                                                                                                                                                                                                                                                                                                                                                                                                                                                                                                                                                                                                                                                                                                                                                                                                                                        |
| Candidate<br>CPG<br>(N = 178)                      | <p><i>AIP</i> (NM_003977), <i>ALK</i> (NM_004304), <i>APEXI</i> (NM_001641), <i>ATMIN</i> (NM_015251), <i>ATR</i> (NM_001184), <i>ATRIP</i> (NM_130384), <i>AURKA</i> (NM_198433), <i>AXINI</i> (NM_003502), <i>BABAMI</i> (NM_001033549), <i>BLM</i> (NM_000057), <i>BRAP</i> (NM_006768), <i>BRCC3</i> (NM_024332), <i>BRE</i> (NM_004899), <i>BUB1B</i> (NM_001211), <i>CASP8</i> (NM_001080125), <i>CCND1</i> (NM_053056), <i>CDC73</i> (NM_024529), <i>CDKN1B</i> (NM_004064), <i>CDKN1C</i> (NM_000076), <i>CEBPA</i> (NM_004364), <i>CEP57</i> (NM_014679), <i>CHEK1</i> (NM_001114122), <i>CLSPN</i> (NM_022111), <i>CSNK1D</i> (NM_001893), <i>CSNK1E</i> (NM_001894), <i>CWF19L2</i> (NM_152434), <i>CYLD</i> (NM_015247), <i>DCLRE1C</i> (NM_001033855), <i>DDB2</i> (NM_000107), <i>DHFR</i> (NM_000791), <i>DICER1</i> (NM_030621), <i>DIS3L2</i> (NM_152383), <i>DMBT1</i> (NM_007329), <i>DMC1</i> (NM_007068), <i>DNAJC21</i> (NM_194283), <i>DPYD</i> (NM_000110), <i>EGFR</i> (NM_005228), <i>EMSY</i> (NM_001300942), <i>EPHX1</i> (NM_000120), <i>ERCC1</i> (NM_001983), <i>ERCC2</i> (NM_000400), <i>ERCC3</i> (NM_000122), <i>ERCC4</i> (NM_005236), <i>ERCC5</i> (NM_000123), <i>ERCC6</i> (NM_000124), <i>ESR1</i> (NM_000125), <i>ESR2</i> (NM_001437), <i>EXO1</i> (NM_006027), <i>EXT1</i> (NM_000127), <i>EXT2</i> (NM_000401), <i>EYA2</i> (NM_005244), <i>EZH2</i> (NM_004456), <i>FAAP24</i> (NM_152266), <i>FAM175A</i> (NM_139076), <i>FAM175B</i> (NM_032182), <i>FAN1</i> (NM_014967), <i>FANCA</i> (NM_000135), <i>FANCB</i> (NM_001018113), <i>FANCC</i> (NM_000136), <i>FANCD2</i> (NM_033084), <i>FANCE</i> (NM_021922), <i>FANCF</i> (NM_022725), <i>FANCG</i> (NM_004629), <i>FANCI</i> (NM_001113378), <i>FANCL</i> (NM_001114636), <i>FANCM</i> (NM_020937), <i>FBXW7</i> (NM_033632), <i>GADD45A</i> (NM_001924), <i>GATA2</i> (NM_001145661), <i>GPC3</i> (NM_004484), <i>GRB7</i> (NM_001242442), <i>HELQ</i> (NM_133636), <i>HNF1A</i> (NM_001306179), <i>HOXB13</i> (NM_006361), <i>HRAS</i> (NM_005343), <i>HUS1</i> (NM_004507), <i>KAT5</i> (NM_182710), <i>KCNJ5</i> (NM_000890), <i>LIG1</i> (NM_000234), <i>LIG3</i> (NM_013975), <i>LIG4</i> (NM_002312), <i>LMO1</i> (NM_002315), <i>LRIG1</i> (NM_015541), <i>MAX</i> (NM_002382), <i>MCPHI</i> (NM_024596), <i>MDC1</i> (NM_014641), <i>MDM2</i> (NM_002392), <i>MDM4</i> (NM_002393), <i>MGMT</i> (NM_002412), <i>MLH3</i> (NM_001040108), <i>MMP8</i> (NM_002424), <i>MPL</i> (NM_005373), <i>MRE11A</i> (NM_005591), <i>MSH3</i> (NM_002439), <i>MSH5</i> (NM_002441), <i>MSR1</i> (NM_138715), <i>MUS81</i> (NM_025128), <i>NATI</i> (NM_000662), <i>NCAM1</i> (NM_001242607), <i>NELFB</i> (NM_015456), <i>NFKBIZ</i> (NM_031419), <i>NHEJ1</i> (NM_024782), <i>NSD1</i> (NM_022455), <i>OGG1</i> (NM_002542), <i>PARP1</i> (NM_001618), <i>PCNA</i> (NM_002592), <i>PHB</i> (NM_002634), <i>PHOX2B</i> (NM_003924), <i>PIK3CG</i> (NM_002649), <i>PLA2G2A</i> (NM_000300), <i>PMS1</i> (NM_000534), <i>POLB</i> (NM_002690), <i>PPM1D</i> (NM_003620), <i>PREX2</i> (NM_024870), <i>PRF1</i> (NM_001083116), <i>PRKDC</i> (NM_006904), <i>PTTG2</i> (NM_006607), <i>RAD1</i> (NM_002853), <i>RAD17</i> (NM_133338), <i>RAD18</i> (NM_020165), <i>RAD23B</i> (NM_002874), <i>RAD50</i> (NM_005732), <i>RAD51</i> (NM_133487), <i>RAD51API</i> (NM_001130862), <i>RAD51B</i> (NM_133509), <i>RAD52</i> (NM_134424), <i>RAD54B</i> (NM_012415), <i>RAD54L</i> (NM_003579), <i>RAD9A</i> (NM_004584), <i>RBBP8</i> (NM_002894), <i>RECQL</i> (NM_002907), <i>RECQL4</i> (NM_004260), <i>RECQL5</i> (NM_004259), <i>RFC1</i> (NM_002913), <i>RFC2</i> (NM_181471), <i>RFC4</i> (NM_181573), <i>RHBDP2</i> (NM_024599), <i>RNF146</i> (NM_001242844), <i>RNF168</i> (NM_152617), <i>RNF8</i> (NM_003958), <i>RPA1</i> (NM_002945), <i>RUNX1</i> (NM_001754), <i>SBDS</i> (NM_016038), <i>SDHA</i> (NM_004168), <i>SDHAF2</i> (NM_017841), <i>SETBP1</i> (NM_015559), <i>SETX</i> (NM_015046), <i>SHPRH</i> (NM_001042683), <i>SLX4</i> (NM_032444), <i>SMARCA4</i> (NM_001128849), <i>SMARCE1</i> (NM_003079), <i>TCL1A</i> (NM_021966), <i>TELO2</i> (NM_016111), <i>TERF2</i> (NM_005652), <i>TERT</i> (NM_198253), <i>TLR2</i> (NM_003264), <i>TLR4</i> (NM_138554), <i>TMEM127</i> (NM_017849), <i>TOPBP1</i> (NM_007027), <i>TP53BP1</i> (NM_001141980), <i>TSHR</i> (NM_000369), <i>UBE2A</i> (NM_003336), <i>UBE2B</i> (NM_003337), <i>UBE2I</i> (NM_003345), <i>UBE2V2</i> (NM_003350), <i>UBE4B</i> (NM_001105562), <i>UIMC1</i> (NM_001199297), <i>WRN</i> (NM_000553), <i>XPA</i> (NM_000380), <i>XPC</i> (NM_004628), <i>XRCC1</i> (NM_006297), <i>XRCC2</i> (NM_005431), <i>XRCC3</i> (NM_005432), <i>XRCC4</i> (NM_022406), <i>XRCC5</i> (NM_021141), <i>XRCC6</i> (NM_001469), <i>ZNF350</i> (NM_021632), <i>ZNF365</i> (NM_014951)</p> |

\* only in case of homozygote or compound heterozygote.

**Table S3: Clinicopathological characteristics in 334 HCC patients' subgroups of carriers PV in cancer-predisposition genes (any CPG) and non-carriers (None).** The characteristics in all patients and in PV carrier subgroups did not differ from that in non-carriers except for those denoted by an asterisk (\* <0.05).

|                                                                              | Any CPG<br>N=47  | Established<br>CPG (N=7) | Candidate<br>CPG (N=40) | None<br>N=287   |
|------------------------------------------------------------------------------|------------------|--------------------------|-------------------------|-----------------|
| <b>Age</b> [years]; median (range)                                           | 65 (40-77)       | 69 (53-72)               | 64 (40-77)              | 63 (26-76)      |
| <b>Cirrhosis</b> ; N= (%)                                                    | <b>45 (95.7)</b> | <b>7 (100)</b>           | <b>38 (95)</b>          | <b>284 (99)</b> |
| Alcoholic                                                                    | 12 (25.5)        | 3 (42.9)                 | 9 (22.5)                | 117 (40.8)      |
| Viral                                                                        | 18 (38.3)        | 3 (42.9)                 | 15 (37.5)               | 102 (35.5)      |
| Cholestatic & autoimmune                                                     | 10 (21.3)        | 1 (14.3)                 | 9 (22.5)                | 38 (13.2)       |
| NASH (non-alcoholic steatohepatitis)                                         | 5 (10.6)         | 0                        | 5 (12.5)                | 24 (8.4)        |
| Metabolic                                                                    | 0                | 0                        | 0                       | 3 (1.0)         |
| <b>None</b>                                                                  | <b>2 (4.3)</b>   | <b>0</b>                 | <b>2 (5.0)</b>          | <b>3 (1.0)</b>  |
| <b>Treatment</b> ; N= (%)                                                    |                  |                          |                         |                 |
| Liver transplantation                                                        | 42 (89.4)        | 5 (71.4)                 | 37 (92.5)               | 257 (89.5)      |
| Other                                                                        | 5 (10.6)         | 2 (28.6)                 | 3 (7.5)                 | 30 (10.4)       |
| <b>HCC characteristics</b>                                                   |                  |                          |                         |                 |
| AFP [ng/mL]; median (range)                                                  | 8 (2-1210)       | 9.6 (2-1210)             | 6.5 (2-699)             |                 |
| Milan criteria; N= (% of known)                                              | 30 (63.8)        | 4 (57.1)                 | 26 (65.0)               | 190 (66.2)      |
| Microangioinvasion; N= (% of known)                                          | 21 (55.3)        | 3 (60.0)                 | 18 (54.5)               | 107 (44.0)      |
| Cholangiocarc. differentiation; N= (% of known)                              | 0                | 0                        | 0                       | 18 (7.1)        |
| <b>Grading</b> ; N= (% of known)                                             |                  |                          |                         |                 |
| 1                                                                            | 5 (12.5)         | 1 (16.7)                 | 4 (11.8)                | 32 (13.1)       |
| 2                                                                            | 19 (47.5)        | 2 (33.3)                 | 17 (50.0)               | 135 (55.1)      |
| 3                                                                            | 16 (40.0)        | 3 (50.0)                 | 13 (38.2)               | 78 (31.8)       |
| <b>Second primary tumor</b> ; N= (%)                                         | 10 (21.4)        | 3 (42.9)                 | 7 (17.5)                | 47 (16.4)       |
| <b>Malignancy in 1<sup>st</sup>/2<sup>nd</sup> degree relatives</b> ; N= (%) | 22 (46.8)        | 3 (42.9)                 | 19 (47.5)               | 109 (38.0)      |
| <b>Diabetes</b> ; N= (%)                                                     | 16 (34.0)        | 1 (14.3)                 | 15 (37.5)               | 122 (42.5)      |
| <b>Obesity (BMI&gt;30)</b> ; N= (%)                                          | 9 (19.1)         | 2 (28.6)                 | 7 (17.5)                | 85 (29.6)       |
| <b>Smoking</b> ; N= (%)                                                      | 19 (40.4)        | 2 (28.6)                 | 17 (42.5)*              | 173 (60.3)*     |

**Table S4: Characterization of HCC patients from retrospective CZECAICA consortium database.** Positive cancer-related characteristics are highlighted in bold.

| Pts #  | Mutation                                     | Age at HCC | Other tumor         | Family cancer history |                                                                                                           |
|--------|----------------------------------------------|------------|---------------------|-----------------------|-----------------------------------------------------------------------------------------------------------|
| CZE_1  | 0                                            | 39         | 0                   | <b>positive</b>       | EC (mother@46), RCC (father@58), BC (mother's sister)                                                     |
| CZE_2  | <b><i>BRCA1: c.1016delA (p.Lys339fs)</i></b> | 44         | 0                   | <b>positive</b>       | OvC (mother@36), RCC (mother's sister)                                                                    |
| CZE_3  | 0                                            | 70         | 0                   | <b>positive</b>       | GaC (father, sister)                                                                                      |
| CZE_4  | 0                                            | NA         | 0                   | <b>positive</b>       | PrC (mother's father@58), OvC (mother's mother@55)                                                        |
| CZE_5  | 0                                            | NA         | <b>BC, RCC</b>      | negative              | 0                                                                                                         |
| CZE_6  | 0                                            | NA         | <b>RCC</b>          | negative              | 0                                                                                                         |
| CZE_7  | <b><i>CHEK2: c.1100delC (p.Thr367fs)</i></b> | NA         | <b>Bilateral BC</b> | <b>positive</b>       | PrC (father)                                                                                              |
| CZE_8  | 0                                            | NA         | <b>EC, LuC</b>      | negative              | 0                                                                                                         |
| CZE_9  | 0                                            | 33         | 0                   | <b>positive</b>       | BC (mother's mother, mother's sister 1@56, mother's sister 2@50), PaC (father's mother)                   |
| CZE_10 | 0                                            | 27         | 0                   | negative              | 0                                                                                                         |
| CZE_11 | 0                                            | 58         | 0                   | <b>positive</b>       | UtC (mother), GaC (father)                                                                                |
| CZE_12 | 0                                            | 64         | 0                   | <b>positive</b>       | HCC (sister)                                                                                              |
| CZE_13 | 0                                            | NA         | 0                   | negative              | 0                                                                                                         |
| CZE_14 | 0                                            | 18         | 0                   | negative              | 0                                                                                                         |
| CZE_15 | 0                                            | NA         | 0                   | negative              | 0                                                                                                         |
| CZE_16 | 0                                            | 60         | 0                   | <b>positive</b>       | PaC (father), BC (father's sister), RCC (mother's brother@60; mother's mother), LuC&HCC (mother's father) |
| CZE_17 | 0                                            | 44         | 0                   | <b>positive</b>       | CRC (mother's father@65)                                                                                  |
| CZE_18 | 0                                            | NA         | 0                   | <b>positive</b>       | PaC (sister), BC (mother), GaC (mother's sister), OvC (mother's mother)                                   |
| CZE_19 | 0                                            | 59         | <b>BC</b>           | <b>positive</b>       | GaC (sister@50)                                                                                           |
| CZE_20 | 0                                            | NA         | <b>CRC</b>          | NA                    | NA                                                                                                        |

BC - breast cancer; EC – endometrial cancer; GaC – gastric cancer; HCC – hepatocellular carcinoma; LuC – lung cancer; OvC – ovarian cancer; PaC – pancreatic cancer; PrC – prostate cancer; RCC - renal cell carcinoma; UtC – uterine cancer; @ - diagnosis at age

**Figure S1: Survival of variant carriers in A. established genes, B. candidate genes, C. MRN genes compared to non-carriers.**

**A.**

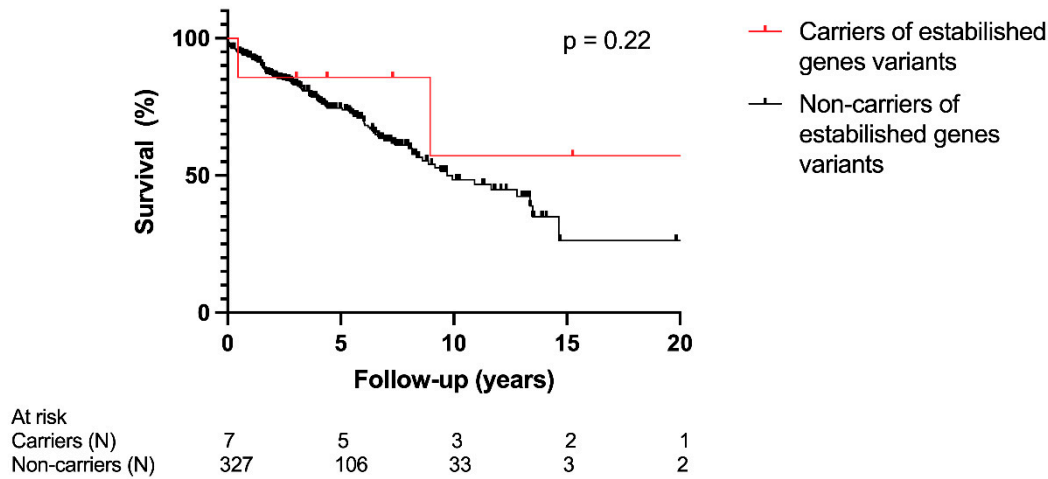

**B.**

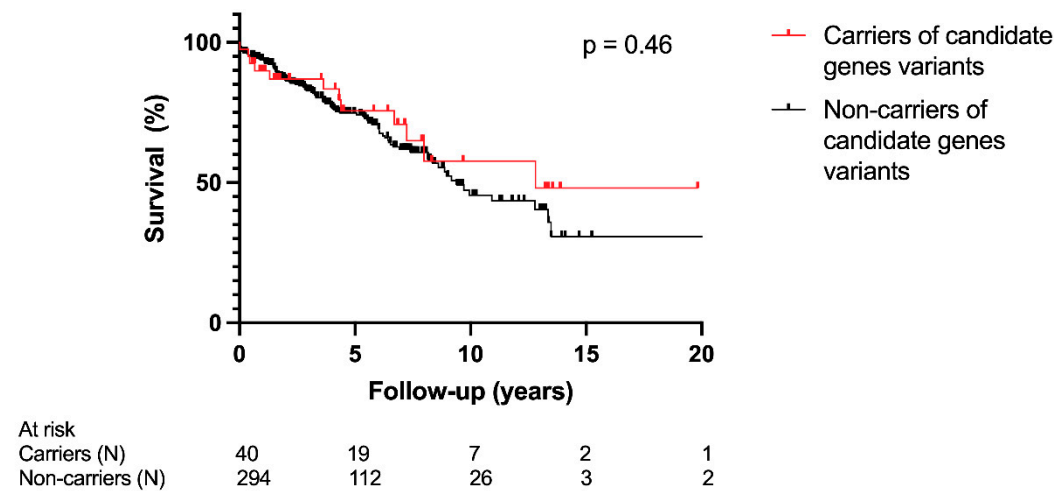

**C.**

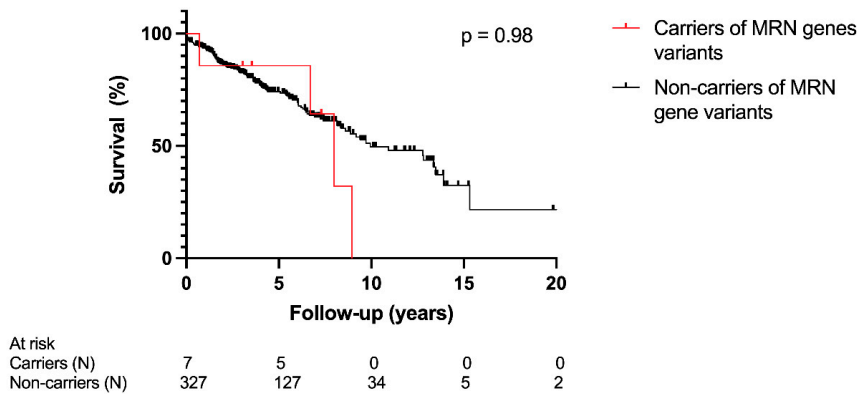

Supplement: s1 [file s1]
